# Supplementary material
Source: PubMed Central journal article supplement (PMC2976295)

**Mock**

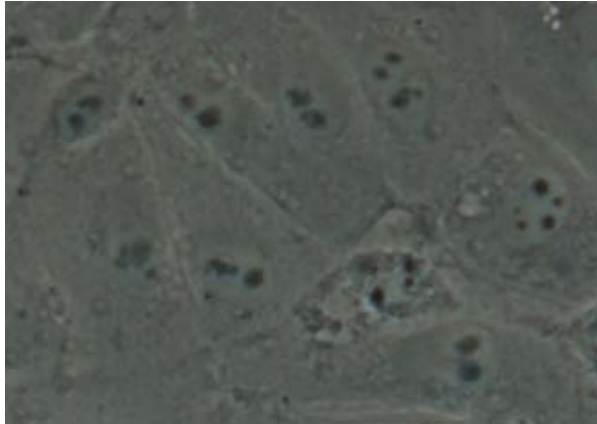

**Nocodazole**

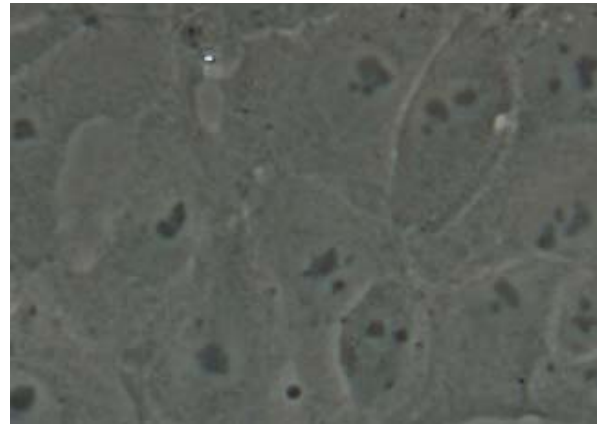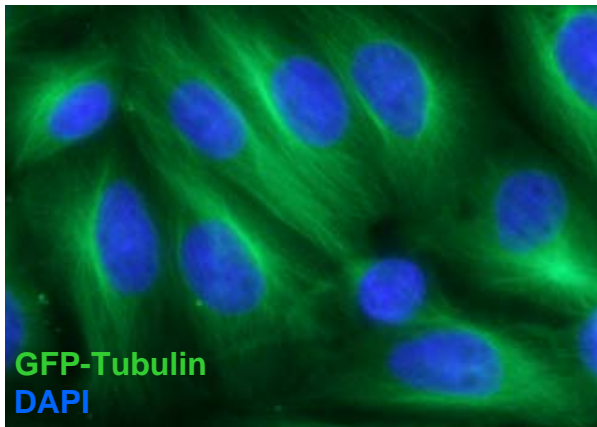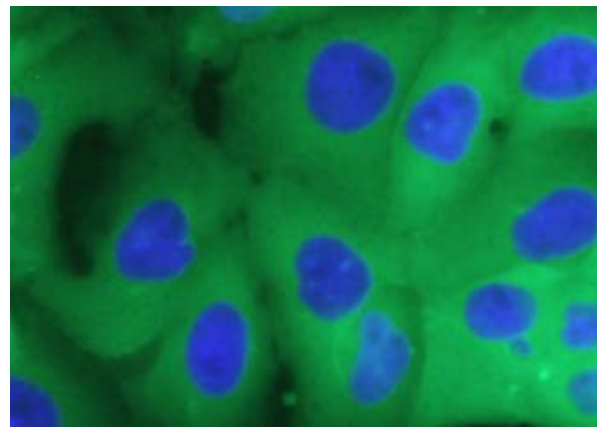

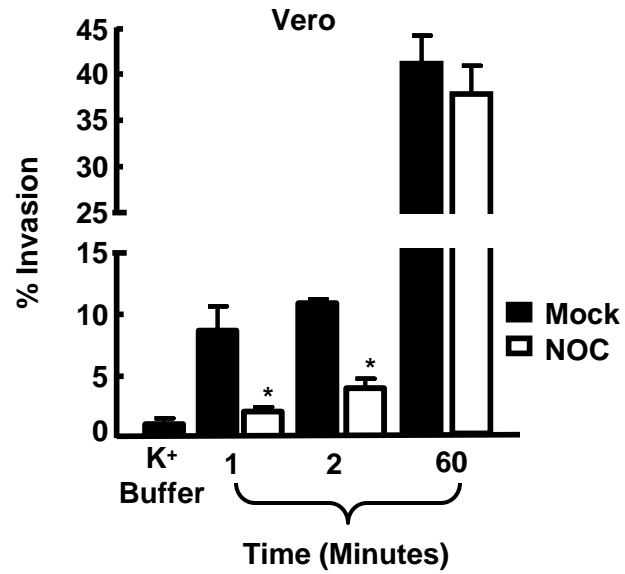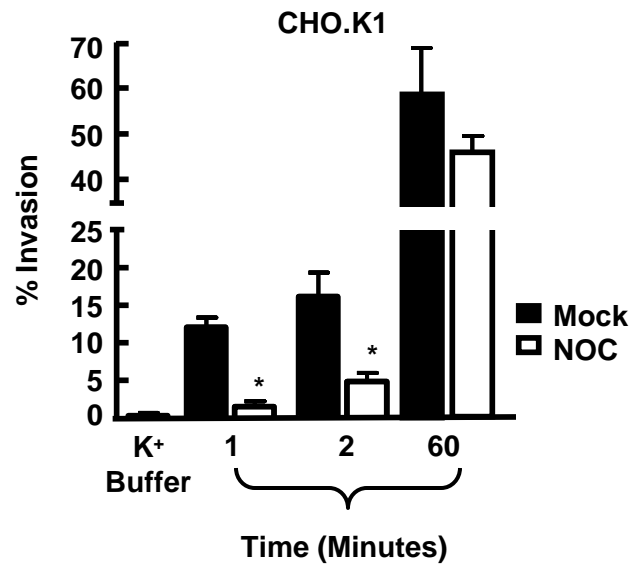

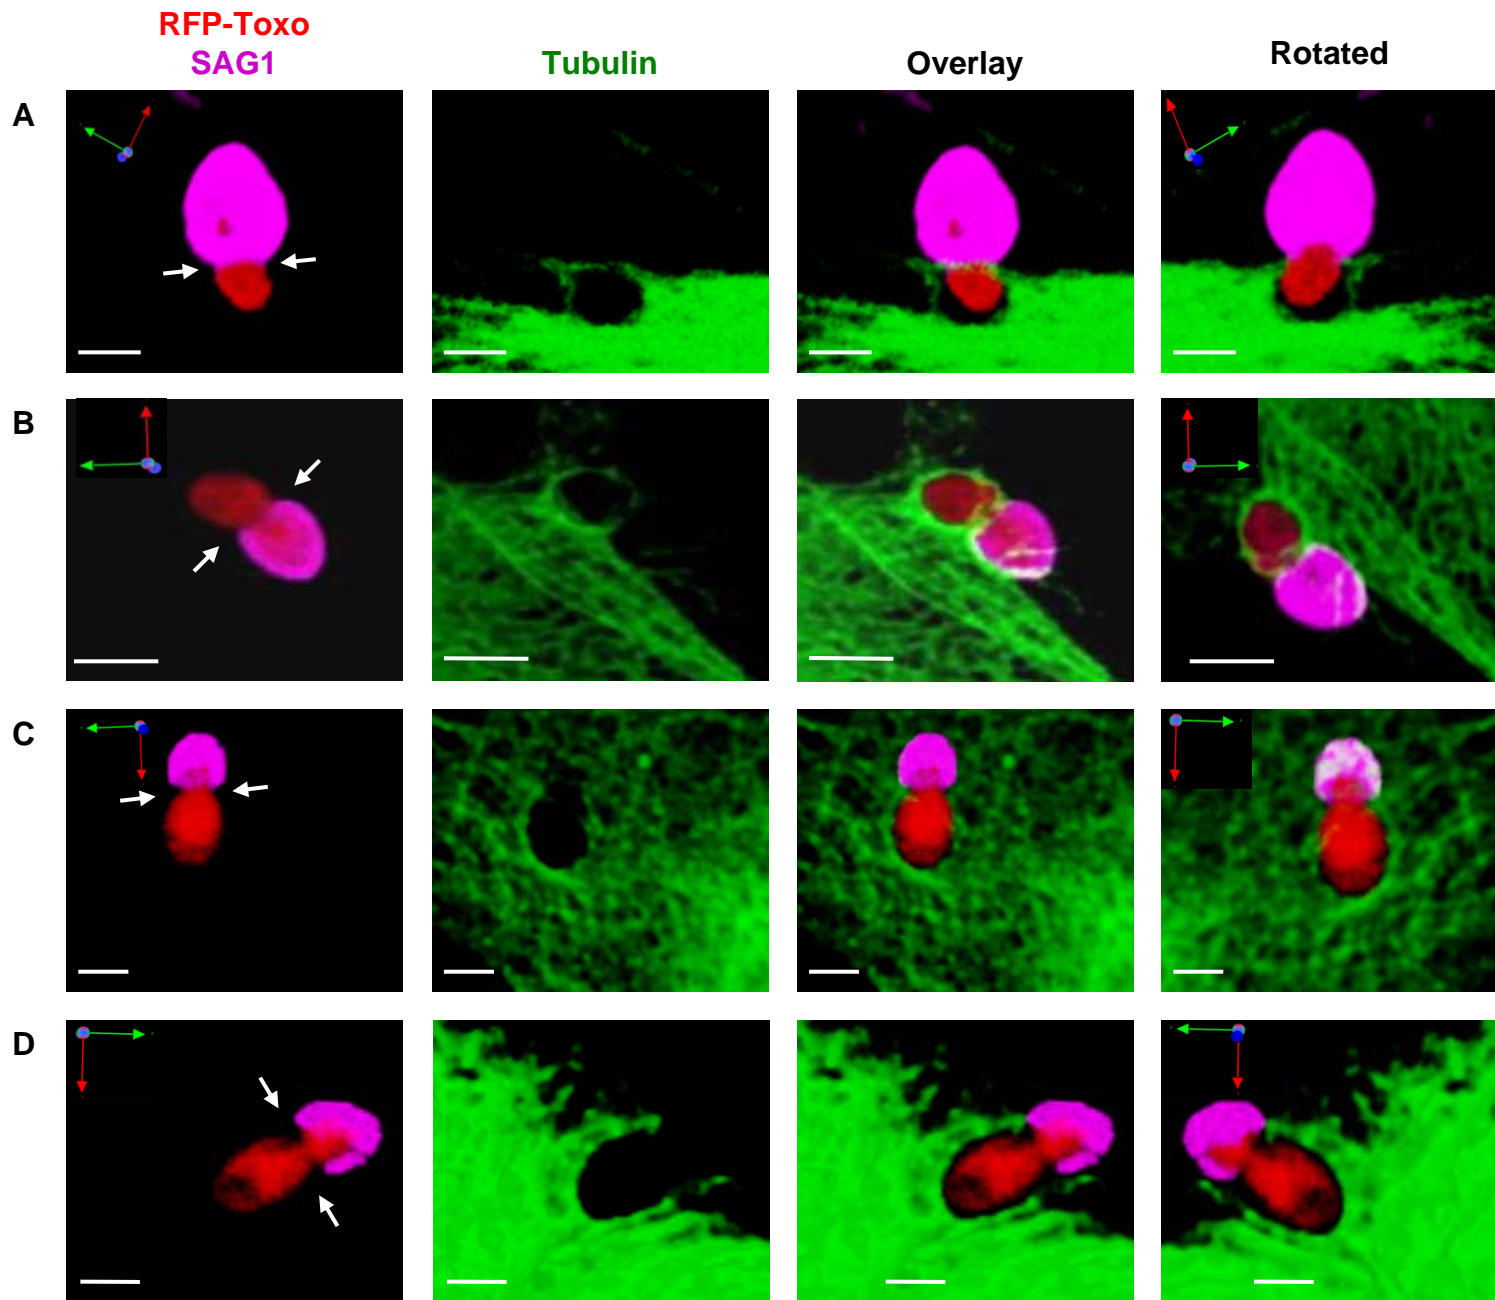

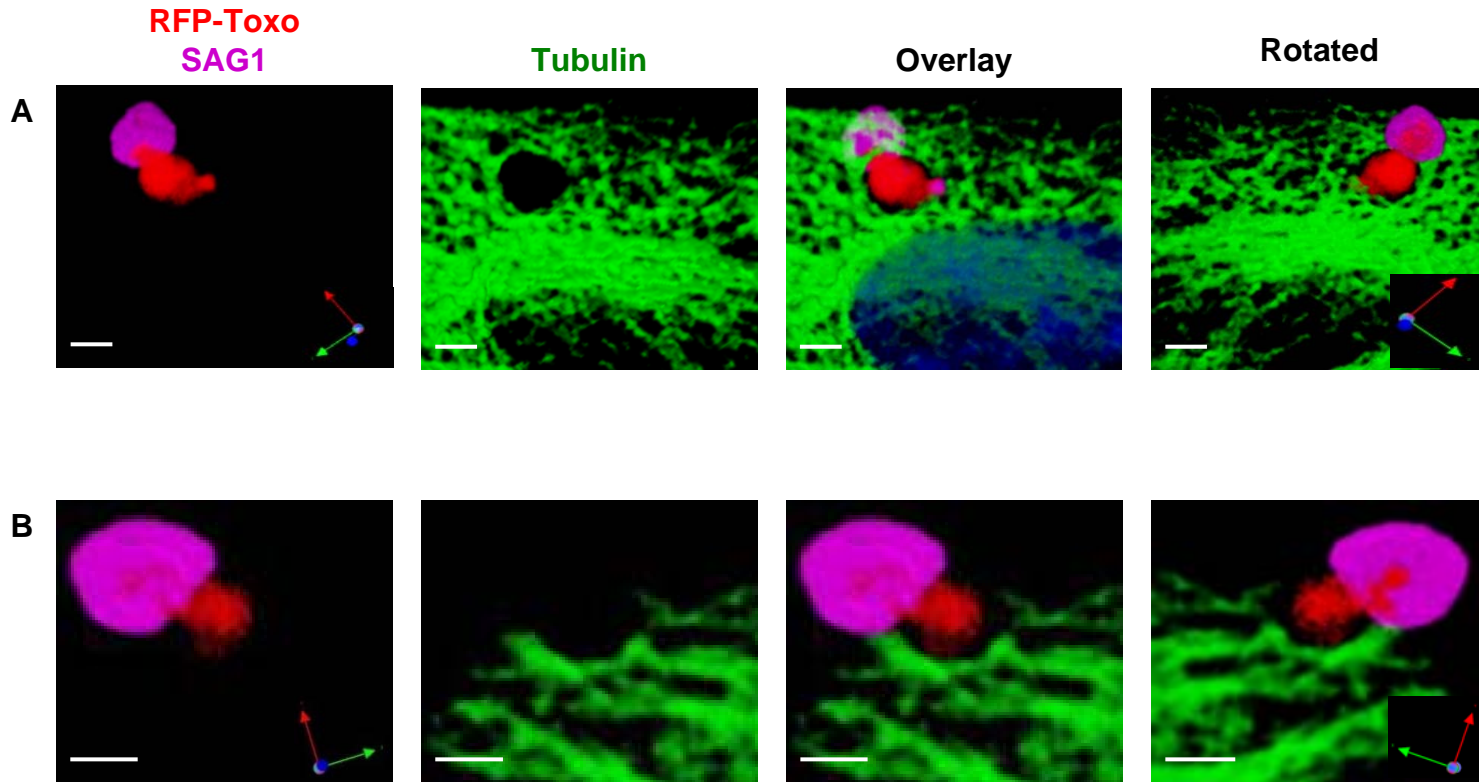

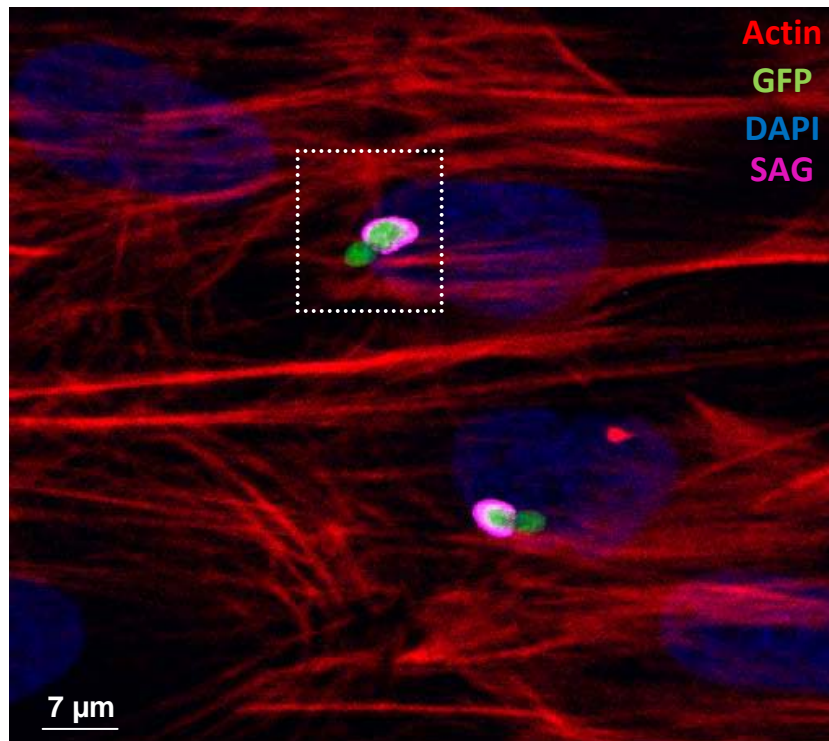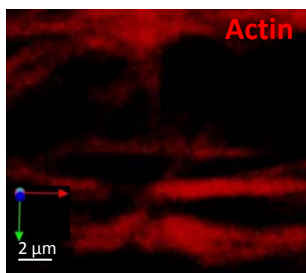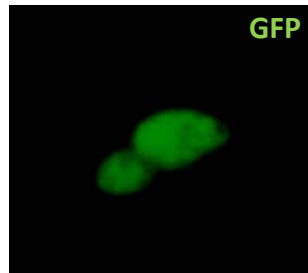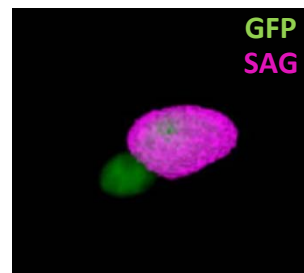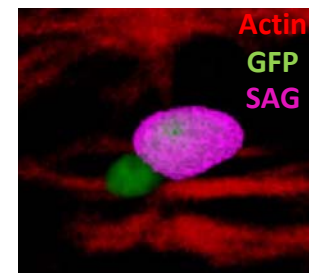

Supplement: supp_9_11_1680__1.pdf [file supp_9_11_1680__1.pdf]
